# Supplementary material for: Charge transfer or biradicaloid character: assessing TD-DFT and SAC-CI for squarylium dye derivatives
Source: Royal Society of Chemistry journal article supplement (doi:10.1039/c4ra10649k), 2015-01-01
Supplement: c4ra10649k1.pdf [file c4ra10649k1.pdf]

### Supporting Information

## Charge Transfer or Biradicaloid Character: Assessing TD-DFT and SAC-CI for Squarylium Dye Derivatives

G. Krishna Chaitanya <sup>a,c,\*</sup>, Avinash L. Puyad <sup>a</sup>, K. Bhanuprakash <sup>b</sup>

<sup>a</sup> School of Chemical Sciences, S.R.T.M. University, Nanded-431 606, India

<sup>b</sup> Inorganic Chemistry Division, Indian Institute of Chemical Technology, Hyderabad, India.

<sup>c</sup> Present address: Materials Research Laboratory, University of Nova Gorica, Slovenia, SI 5000,

Table S1: diagnostic indices obtained at TD-DFT and SAC-CI methodologies for SQ derivatives

| Molecule | Methodology | $q^{CT}$ (e) | $D^{CT}$ (Å) | $\mu^{CT}$ (Debye) | H Index (Å) | $C^+/C^-$ |
|----------|-------------|--------------|--------------|--------------------|-------------|-----------|
| SQ-1     | B3LYP       | 0.51         | 0.001        | 0.003              | 2.14        | 0.78      |
|          | BHandLYP    | 0.49         | 0.001        | 0.003              | 2.10        | 0.79      |
|          | Cam-B3LYP   | 0.48         | 0.001        | 0.003              | 2.12        | 0.78      |
|          | M06HF       | 0.42         | 0.001        | 0.003              | 2.13        | 0.81      |
|          | M062X       | 0.46         | 0.001        | 0.003              | 2.12        | 0.79      |
|          | WB97XD      | 0.49         | 0.001        | 0.003              | 2.12        | 0.78      |
|          | SAC-CI      | 0.51         | 0.001        | 0.003              | 2.05        | 0.81      |
| SQ-2     | B3LYP       | 0.36         | 0.001        | 0.002              | 3.42        | 0.98      |
|          | BHandLYP    | 0.43         | 0.001        | 0.002              | 3.38        | 0.98      |
|          | Cam-B3LYP   | 0.41         | 0.001        | 0.002              | 3.30        | 0.98      |
|          | M06HF       | 0.42         | 0.001        | 0.002              | 3.43        | 0.98      |
|          | M062X       | 0.38         | 0.001        | 0.002              | 3.41        | 0.98      |

|             |           |      |       |       |      |      |
|-------------|-----------|------|-------|-------|------|------|
|             | WB97XD    | 0.42 | 0.001 | 0.002 | 3.24 | 0.98 |
|             | SAC-CI    | 0.49 | 0.001 | 0.002 | 3.84 | 0.97 |
| <b>SQ-3</b> | B3LYP     | 0.34 | 0.008 | 0.013 | 3.51 | 0.98 |
|             | BHandLYP  | 0.43 | 0.002 | 0.005 | 3.39 | 0.99 |
|             | Cam-B3LYP | 0.41 | 0.002 | 0.004 | 3.33 | 0.99 |
|             | M06HF     | 0.41 | 0.002 | 0.005 | 3.34 | 0.98 |
|             | M062X     | 0.37 | 0.002 | 0.004 | 3.40 | 0.98 |
|             | WB97XD    | 0.42 | 0.002 | 0.004 | 3.28 | 0.98 |
|             | SAC-CI    | 0.48 | 0.002 | 0.004 | 3.61 | 0.98 |
| <b>SQ-4</b> | B3LYP     | 0.33 | 0.000 | 0.000 | 3.67 | 0.99 |
|             | BHandLYP  | 0.43 | 0.000 | 0.001 | 3.43 | 0.99 |
|             | Cam-B3LYP | 0.40 | 0.000 | 0.001 | 3.36 | 0.99 |
|             | M06HF     | 0.41 | 0.000 | 0.001 | 3.34 | 0.99 |
|             | M062X     | 0.37 | 0.000 | 0.001 | 3.45 | 0.99 |
|             | WB97XD    | 0.41 | 0.000 | 0.001 | 3.31 | 0.99 |
|             | SAC-CI    | 0.49 | 0.000 | 0.000 | 3.72 | 0.98 |
| <b>SQ-5</b> | B3LYP     | 0.32 | 0.002 | 0.003 | 3.59 | 0.95 |
|             | BHandLYP  | 0.38 | 0.004 | 0.006 | 3.49 | 0.97 |
|             | Cam-B3LYP | 0.36 | 0.002 | 0.004 | 3.47 | 0.97 |
|             | M06HF     | 0.37 | 0.002 | 0.003 | 3.40 | 0.98 |
|             | M062X     | 0.33 | 0.002 | 0.003 | 3.48 | 0.97 |
|             | WB97XD    | 0.38 | 0.002 | 0.003 | 3.44 | 0.97 |
|             | SAC-CI    | 0.36 | 0.001 | 0.001 | 3.39 | 0.98 |
| <b>SQ-6</b> | B3LYP     | 0.29 | 0.011 | 0.016 | 3.85 | 0.96 |

|             |           |      |       |       |      |      |
|-------------|-----------|------|-------|-------|------|------|
|             | BHandLYP  | 0.36 | 0.003 | 0.005 | 3.78 | 0.98 |
|             | Cam-B3LYP | 0.35 | 0.005 | 0.009 | 3.75 | 0.98 |
|             | M06HF     | 0.38 | 0.009 | 0.017 | 3.82 | 0.99 |
|             | M062X     | 0.32 | 0.006 | 0.009 | 3.79 | 0.98 |
|             | WB97XD    | 0.37 | 0.010 | 0.018 | 3.71 | 0.98 |
|             | SAC-CI    | 0.36 | 0.008 | 0.013 | 3.80 | 0.98 |
| <b>SQ-7</b> | B3LYP     | 0.32 | 0.004 | 0.006 | 3.85 | 0.98 |
|             | BHandLYP  | 0.40 | 0.003 | 0.005 | 3.60 | 0.99 |
|             | Cam-B3LYP | 0.38 | 0.003 | 0.005 | 3.57 | 0.99 |
|             | M06HF     | 0.38 | 0.003 | 0.005 | 3.48 | 0.99 |
|             | M062X     | 0.34 | 0.009 | 0.015 | 3.63 | 0.98 |
|             | WB97XD    | 0.39 | 0.003 | 0.006 | 3.52 | 0.98 |
|             | SAC-CI    | 0.44 | 0.004 | 0.008 | 3.71 | 0.98 |
| <b>SQ-8</b> | B3LYP     | 0.37 | 0.004 | 0.008 | 3.30 | 0.97 |
|             | BHandLYP  | 0.44 | 0.001 | 0.002 | 3.26 | 0.98 |
|             | Cam-B3LYP | 0.42 | 0.001 | 0.002 | 3.20 | 0.97 |
|             | M06HF     | 0.42 | 0.001 | 0.001 | 3.30 | 0.98 |
|             | M062X     | 0.39 | 0.002 | 0.005 | 3.28 | 0.98 |
|             | WB97XD    | 0.43 | 0.005 | 0.010 | 3.14 | 0.97 |
|             | SAC-CI    | 0.48 | 0.001 | 0.001 | 3.62 | 0.97 |
| <b>SQ-9</b> | B3LYP     | 0.35 | 0.003 | 0.005 | 3.74 | 0.97 |
|             | BHandLYP  | 0.43 | 0.004 | 0.008 | 3.55 | 0.98 |
|             | Cam-B3LYP | 0.41 | 0.003 | 0.003 | 3.50 | 0.98 |
|             | M06HF     | 0.41 | 0.004 | 0.009 | 3.43 | 0.98 |

|              |           |      |       |       |      |      |
|--------------|-----------|------|-------|-------|------|------|
|              | M062X     | 0.37 | 0.008 | 0.015 | 3.56 | 0.98 |
|              | WB97XD    | 0.42 | 0.005 | 0.010 | 3.45 | 0.98 |
|              | SAC-CI    | 0.48 | 0.003 | 0.006 | 3.67 | 0.97 |
| <b>SQ-10</b> | B3LYP     | 0.41 | 0.002 | 0.003 | 3.03 | 0.94 |
|              | BHandLYP  | 0.44 | 0.016 | 0.034 | 2.98 | 0.97 |
|              | Cam-B3LYP | 0.43 | 0.001 | 0.002 | 2.95 | 0.96 |
|              | M06HF     | 0.41 | 0.002 | 0.003 | 2.94 | 0.97 |
|              | M062X     | 0.40 | 0.001 | 0.002 | 2.96 | 0.96 |
|              | WB97XD    | 0.44 | 0.001 | 0.002 | 2.92 | 0.96 |
|              | SAC-CI    | 0.46 | 0.001 | 0.003 | 2.97 | 0.97 |
| <b>SQ-11</b> | B3LYP     | 0.34 | 0.003 | 0.005 | 2.99 | 0.97 |
|              | BHandLYP  | 0.38 | 0.003 | 0.006 | 2.91 | 0.99 |
|              | Cam-B3LYP | 0.37 | 0.003 | 0.005 | 2.89 | 0.99 |
|              | M06HF     | 0.36 | 0.003 | 0.004 | 2.87 | 0.99 |
|              | M062X     | 0.34 | 0.003 | 0.004 | 2.91 | 0.98 |
|              | WB97XD    | 0.38 | 0.003 | 0.006 | 2.87 | 0.98 |
|              | SAC-CI    | 0.38 | 0.003 | 0.005 | 3.00 | 0.99 |
| <b>SQ-12</b> | B3LYP     | 0.34 | 0.003 | 0.005 | 4.62 | 0.98 |
|              | BHandLYP  | 0.42 | 0.004 | 0.008 | 4.13 | 0.99 |
|              | Cam-B3LYP | 0.40 | 0.004 | 0.007 | 4.07 | 0.99 |
|              | M06HF     | 0.41 | 0.004 | 0.008 | 3.81 | 0.99 |
|              | M062X     | 0.37 | 0.005 | 0.008 | 4.15 | 0.98 |
|              | WB97XD    | 0.42 | 0.004 | 0.008 | 3.98 | 0.99 |
|              | SAC-CI    | 0.46 | 0.004 | 0.008 | 4.03 | 0.99 |

|              |           |      |       |       |      |      |
|--------------|-----------|------|-------|-------|------|------|
| <b>SQ-13</b> | B3LYP     | 0.40 | 0.037 | 0.072 | 3.26 | 0.96 |
|              | BHandLYP  | 0.40 | 0.024 | 0.046 | 3.41 | 0.99 |
|              | Cam-B3LYP | 0.39 | 0.023 | 0.043 | 3.37 | 0.99 |
|              | M06HF     | 0.40 | 0.013 | 0.026 | 3.47 | 0.98 |
|              | M062X     | 0.36 | 0.021 | 0.037 | 3.45 | 0.98 |
|              | WB97XD    | 0.40 | 0.018 | 0.014 | 3.32 | 0.99 |
|              | SAC-CI    | 0.45 | 0.010 | 0.022 | 3.71 | 0.97 |
| <b>SQ-14</b> | B3LYP     | 0.35 | 0.007 | 0.012 | 3.92 | 0.96 |
|              | BHandLYP  | 0.42 | 0.008 | 0.016 | 3.57 | 0.98 |
|              | Cam-B3LYP | 0.39 | 0.008 | 0.016 | 3.55 | 0.97 |
|              | M06HF     | 0.39 | 0.012 | 0.022 | 3.40 | 0.98 |
|              | M062X     | 0.36 | 0.011 | 0.019 | 3.61 | 0.97 |
|              | WB97XD    | 0.40 | 0.019 | 0.037 | 3.48 | 0.97 |
|              | SAC-CI    | 0.45 | 0.002 | 0.004 | 3.51 | 0.98 |

Table S2: Calculated absorption maxima ( $\lambda_{\max}$  in nm), oscillator strength ( $f$ ) and main configuration of the S0-S1 transition of cyanine dye obtained with different XC functionals with 6-311++G(d,p) basis set.

| XC-functional  | $\lambda_{\max}$ | $f$   | Main configuration                            |
|----------------|------------------|-------|-----------------------------------------------|
| B3LYP          | 445              | 2.324 | 0.720 (H→L) -0.163 (L→H)+0.060 (H-1→L+1)      |
| BHandHLYP      | 436              | 2.423 | 0.702 (H→L) +0.108 (H-1→L+1)-0.097(L→H)       |
| CAM-B3LYP      | 450              | 2.349 | 0.700 (H→L)+0.115 (H-1→L+1)-0.096(L→H)        |
| M06-HF         | 480              | 2.259 | 0.685 (H→L)+0.113 (H-1→L+12)-<br>0.080(H→L+7) |
| M06-2X         | 456              | 2.317 | 0.704 (H→L)-0.107 (L→H)+0.109 (H-1→L+1)       |
| $\omega$ B97XD | 452              | 2.346 | 0.696 (H→L)+0.127 (H-1→L+1)-0.081(L→H)        |
